# Supplementary material
Source: PubMed Central journal article supplement (PMC3570697)
Supplement: NIHMS417547-supplement-1_si_001.pdf [file NIHMS417547-supplement-1_si_001.pdf]

## Supporting Information for

Production of Cytotoxic Glidobactins/Luminmycins by *Photorhabdus asymbiotica* in Liquid Media and Live Crickets

Christine M. Theodore,<sup>†,‡</sup> Jarrod B. King,<sup>†,‡</sup> Jianlan You,<sup>†,‡</sup> Robert H. Cichewicz<sup>\*,†,‡</sup>

Natural Products Discovery Group, Institute for Natural Products Applications and Research Technologies, Stephenson Life Sciences Research Center, 101 Stephenson Parkway, University of Oklahoma, Norman, Oklahoma, 73019-5251, USA.

Department of Chemistry and Biochemistry, Stephenson Life Sciences Research Center 101 Stephenson Parkway, Room 1000, University of Oklahoma, Norman, Oklahoma, 73019-5251, USA.

<sup>†</sup> Natural Products Discovery Group.

<sup>‡</sup> Department of Chemistry and Biochemistry.

## Supporting Information Contents

**Table S1.** Summary of antiSMASH analysis of the *P. asymbiotica* ATCC43949 genome.

**Table S2.** Summary of media types tested to induce the production of glidobactin/luminmycins.

**Figure S1.** Screen shot of antiSMASH results for secondary metabolite gene cluster 15.

**Figure S2.**  $^1\text{H}$ -NMR (500 MHz,  $\text{DMSO-}d_6$ , 25 °C) spectrum of compound **3**.

**Figure S3.**  $^1\text{H}$ - $^{13}\text{C}$  HSQC (500 MHz,  $\text{DMSO-}d_6$ , 25 °C) spectrum of compound **3**.

**Figure S4.**  $^1\text{H}$ - $^{13}\text{C}$  gHMBC (500 MHz,  $\text{DMSO-}d_6$ , 25 °C) spectrum of compound **3**.

**Figure S5.**  $^1\text{H}$ - $^1\text{H}$  gCOSY (500 MHz,  $\text{DMSO-}d_6$ , 25 °C) spectrum of compound **3**.

**Figure S6.**  $^1\text{H}$ - $^1\text{H}$  tCOSY (500 MHz,  $\text{DMSO-}d_6$ , 25 °C) spectrum of compound **3**.

**Figure S7.** IR spectrum (thin film, room temperature) of compound **3**.

**Figure S8.** HRESIMS (positive mode) data for compound **3**.

**Figure S9.** *In vitro* cytotoxicity (upper panel) and proteasome inhibition (lower panel) for **1**, **2**, and **3** in normal mouse fibroblast cells.

**Table S1.** Summary of antiSMASH analysis of the *P. asymbiotica* ATCC43949 genome. Putative gene clusters for secondary metabolites and their genomic locations are shown. Cluster 15 was identified homologous the genes responsible for glidobactin biosynthesis. NRPS: non-ribosomal peptide synthase, T1PKS: type 1 polyketide synthase.

| Gene Cluster | Type of cluster   | Location (nt)     |
|--------------|-------------------|-------------------|
| 1            | NRPS-T1PKS        | 487299-542304     |
| 2            | NRPS-nucleoside   | 688894-740731     |
| 3            | NRPS              | 968421-1031926    |
| 4            | T1PKS             | 1023946-1075950   |
| 5            | T1PKS             | 1352218-1399789   |
| 6            | Phosphoglycolipid | 143926-1481759    |
| 7            | NRPS              | 1492345 - 1544792 |
| 8            | NRPS              | 1645504 - 1695686 |
| 9            | NRPS              | 1677807 - 1734065 |
| 10           | NRPS              | 2014496 - 2059374 |
| 11           | NRPS-T1PKS        | 2456784 - 2519934 |
| 12           | NRPS-T1PKS        | 2593887 - 2661296 |
| 13           | Other             | 2686922 - 2731935 |
| 14           | NRPS              | 2899960 - 2946214 |
| 15           | T1PKS-NRPS        | 3035604 - 3103761 |
| 16           | NRPS              | 3491508 - 3558715 |
| 17           | NRPS              | 3582829 - 3640789 |
| 18           | NRPS              | 3915538 - 4000273 |
| 19           | Butyrolactone     | 4366935 - 4374226 |

**Table S2.** Summary of media types tested to induce the production of glidobactin/luminmycins.

| Name                                      | Formulation                                                                                                                                                                                                                                                                                                                                                                                                                     | Compounds induced                                    |
|-------------------------------------------|---------------------------------------------------------------------------------------------------------------------------------------------------------------------------------------------------------------------------------------------------------------------------------------------------------------------------------------------------------------------------------------------------------------------------------|------------------------------------------------------|
| TSB                                       | Commercially available                                                                                                                                                                                                                                                                                                                                                                                                          | -                                                    |
| TSB plus chitin                           | Commercially available mix at 75% strength with 7.5 g·L <sup>-1</sup> chitin                                                                                                                                                                                                                                                                                                                                                    | -                                                    |
| TSB plus soil                             | Commercially available mix with 10% v/v soil extract added prior to autoclaving                                                                                                                                                                                                                                                                                                                                                 | -                                                    |
| TSB plus blood                            | Commercially available mix with 5% v/v sterile sheep blood added after autoclaving                                                                                                                                                                                                                                                                                                                                              | -                                                    |
| TSB plus bugs                             | Commercially available mix with 3 ground bugs collected in Norman, OK added to 300 mL of broth prior to autoclaving                                                                                                                                                                                                                                                                                                             | -                                                    |
| TSB mimic, less sugar increased tryptone  | In g·L <sup>-1</sup> : dextrose ( 1.7), tryptone (27), NaCl (5), K <sub>2</sub> HPO <sub>4</sub> (2.5)                                                                                                                                                                                                                                                                                                                          | -                                                    |
| TSB mimic, less tryptone, increased sugar | In g·L <sup>-1</sup> : dextrose ( 1.7), tryptone (27), NaCl (5), K <sub>2</sub> HPO <sub>4</sub> (2.5)                                                                                                                                                                                                                                                                                                                          | -                                                    |
| TSB mimic, glucose                        | In g·L <sup>-1</sup> : glucose (2.5), tryptone (20), NaCl (5), K <sub>2</sub> HPO <sub>4</sub> (2.5)                                                                                                                                                                                                                                                                                                                            | -                                                    |
| TSB mimic, ribose                         | In g·L <sup>-1</sup> : ribose (2.5), tryptone (20), NaCl (5), K <sub>2</sub> HPO <sub>4</sub> (2.5)                                                                                                                                                                                                                                                                                                                             | -                                                    |
| TSB mimic, sucrose                        | In g·L <sup>-1</sup> : sucrose (2.5), tryptone (20), NaCl (5), K <sub>2</sub> HPO <sub>4</sub> (2.5)                                                                                                                                                                                                                                                                                                                            | -                                                    |
| Actinomyces broth                         | Commercially available                                                                                                                                                                                                                                                                                                                                                                                                          | -                                                    |
| Potato dextrose                           | Commercially available                                                                                                                                                                                                                                                                                                                                                                                                          | <b>1</b>                                             |
| Luria broth                               | Commercially available                                                                                                                                                                                                                                                                                                                                                                                                          | <b>1</b>                                             |
| Luria broth plus homogenized bugs         | Commercially available mix with approximately 10 bugs collected in Norman, OK added to 300 mL of broth and homogenized with mechanical homogenizer prior to autoclaving                                                                                                                                                                                                                                                         | <b>1</b>                                             |
| Defined medium <sup>a</sup>               | In g·L <sup>-1</sup> : KH <sub>2</sub> PO <sub>4</sub> (2.0), NH <sub>4</sub> Cl (1.5), MgSO <sub>4</sub> ·7H <sub>2</sub> O (0.5), glycerol (10), myo-inositol (0.4), monosodium L-glutamate monohydrate (5.0), NaF (0.084), FeSO <sub>4</sub> ·7H <sub>2</sub> O (0.025), ZnSO <sub>4</sub> ·7H <sub>2</sub> O (0.01), CoCl <sub>2</sub> ·6H <sub>2</sub> O (0.01), CaCO <sub>3</sub> (0.25), <i>p</i> -aminobenzoate (0.001) | <b>1, 2, 3</b>                                       |
| Defined medium, honey as carbon source    | Same as defined medium but with 10g·L <sup>-1</sup> of honey in place of glycerol                                                                                                                                                                                                                                                                                                                                               | <b>1</b> , (trace amounts of <b>2</b> and <b>3</b> ) |
| Defined medium, sucrose as carbon source  | Same as defined medium but with 10g·L <sup>-1</sup> of sucrose in place of glycerol                                                                                                                                                                                                                                                                                                                                             | <b>1</b> , (trace amounts of <b>2</b> and <b>3</b> ) |
| Defined medium, glucose as carbon source  | Same as defined medium but with 10g·L <sup>-1</sup> of glucose in place of glycerol                                                                                                                                                                                                                                                                                                                                             | <b>1, 2, 3</b>                                       |
| Defined medium, 10% v/v                   | Same as defined medium, with the addition of                                                                                                                                                                                                                                                                                                                                                                                    | <b>1, 2, 3</b>                                       |

|                                         |                                                                                                                               |          |
|-----------------------------------------|-------------------------------------------------------------------------------------------------------------------------------|----------|
| sheep blood                             | 10% v/v of sterile sheep blood added after autoclaving                                                                        |          |
| 0.25x seawater                          | In g·L <sup>-1</sup> : NH <sub>4</sub> Cl (1.5), glycerol (10), monosodium L-glutamate monohydrate (5), instant ocean (8.8)   | -        |
| 0.5x seawater                           | In g·L <sup>-1</sup> : NH <sub>4</sub> Cl (1.5), glycerol (10), monosodium L-glutamate monohydrate (5), instant ocean (17.5)  | -        |
| 1x seawater                             | In g·L <sup>-1</sup> : NH <sub>4</sub> Cl (1.5), glycerol (10), monosodium L-glutamate monohydrate (5), instant ocean (35.0)  | -        |
| Dulbecco's modified Eagle Medium (DMEM) | Sterile filtered, commercially available                                                                                      | <b>1</b> |
| DMEM plus 5% fetal bovine serum (FBS)   | Sterile, filtered, commercially available DMEM and FBS added at 5% v/v                                                        | -        |
| DMEM plus glycerol                      | In g·L <sup>-1</sup> : glycerol (10). Autoclaved and mixed with sterile, filtered, commercially available DMEM                | <b>1</b> |
| DMEM plus glycerol and 5% FBS           | In g·L <sup>-1</sup> : glycerol (10). Autoclaved and mixed with sterile, filtered, commercially available DMEM and 5% v/v FBS | -        |
| Plant food plus glycerol                | In g·L <sup>-1</sup> : plant food, commercially available water soluble (1.6), glycerol (10)                                  | <b>1</b> |
| Plant food plus sucrose                 | In g·L <sup>-1</sup> : plant food, commercially available water soluble (1.6), sucrose (10)                                   | <b>1</b> |
| Plant food plus glucose                 | In g·L <sup>-1</sup> : plant food, commercially available water soluble (1.6), glucose (10)                                   | <b>1</b> |
| Plant food plus honey                   | In g·L <sup>-1</sup> : plant food, commercially available water soluble (1.6), honey (10)                                     | <b>1</b> |
| Plant food plus cholesterol             | In g·L <sup>-1</sup> : plant food, commercially available water soluble (1.6), cholesterol (10)                               | -        |
| Skim milk                               | In g·L <sup>-1</sup> : skim milk powder (10)                                                                                  | -        |
| Skim milk plus glycerol                 | In g·L <sup>-1</sup> : skim milk powder (10), glycerol (10)                                                                   | -        |

Compound **1** : Glidobactin A; Compound **2**: Luminmycin A; Compound **3**: Luminmycin D;

<sup>a</sup> Defined medium described by Rateb *et al. J. Nat. Prod.* **2011**, *74*, 1965-1971.

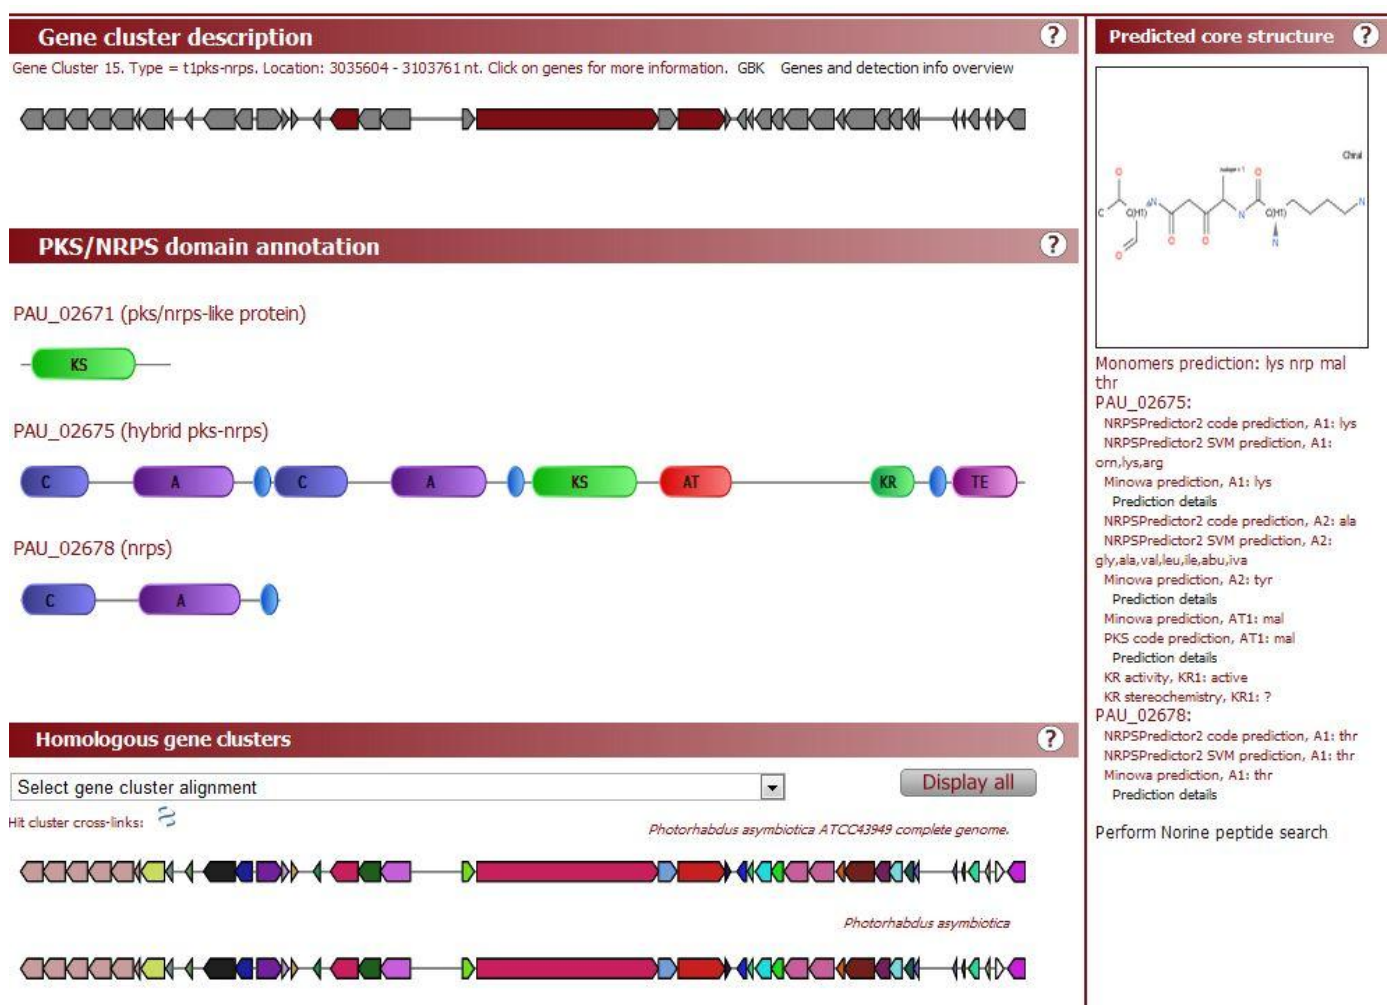

**Figure S1.** Screen shot of antiSMASH results for secondary metabolite gene cluster 15; the cluster predicted to produce glidobactin-like compounds. KS: ketosynthase, A: AMP binding domain, C: condensation domain, AT: acyl transferase, KR: ketoreductase, TE: thioesterase.

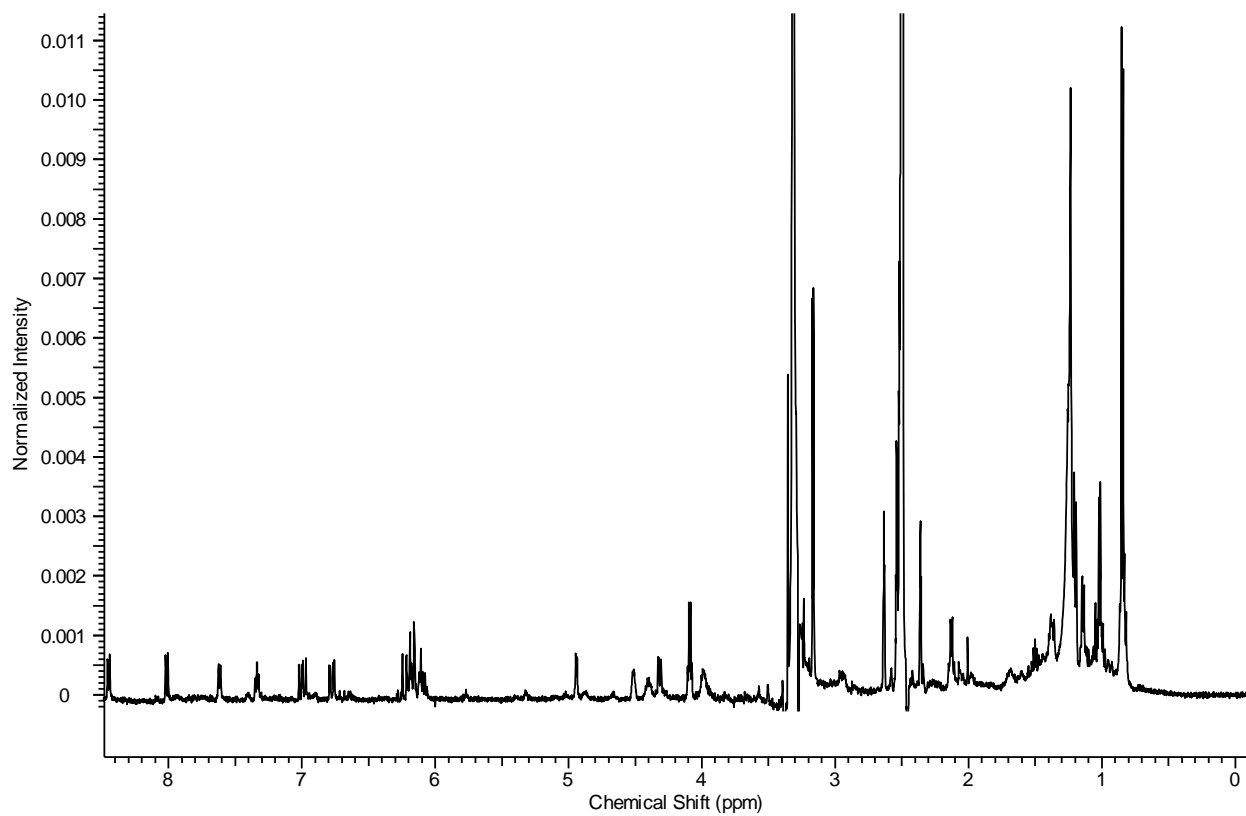

**Figure S2.**  $^1\text{H-NMR}$  (500 MHz,  $\text{DMSO-}d_6$ , 25  $^\circ\text{C}$ ) spectrum of compound **3**.

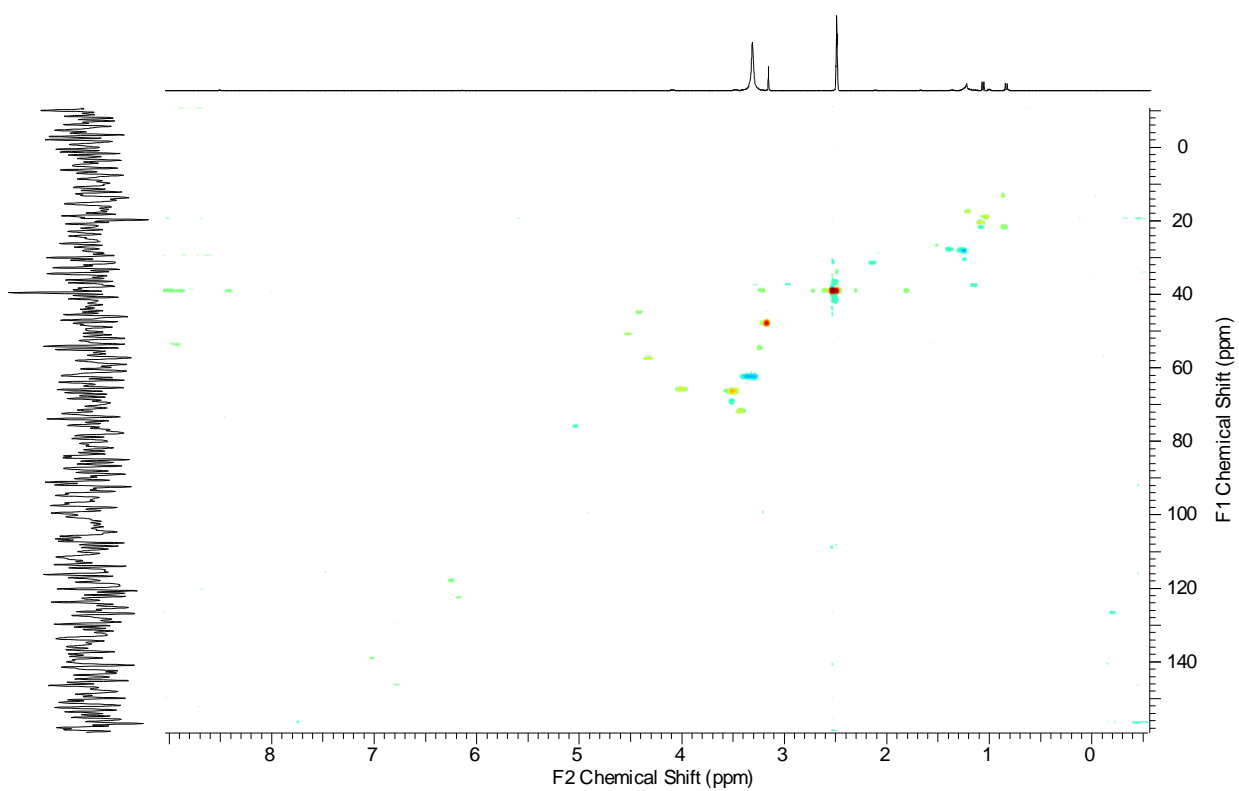

**Figure S3.**  $^1\text{H}$ - $^{13}\text{C}$  HSQC (500 MHz,  $\text{DMSO-}d_6$ , 25  $^\circ\text{C}$ ) spectrum of compound **3**.



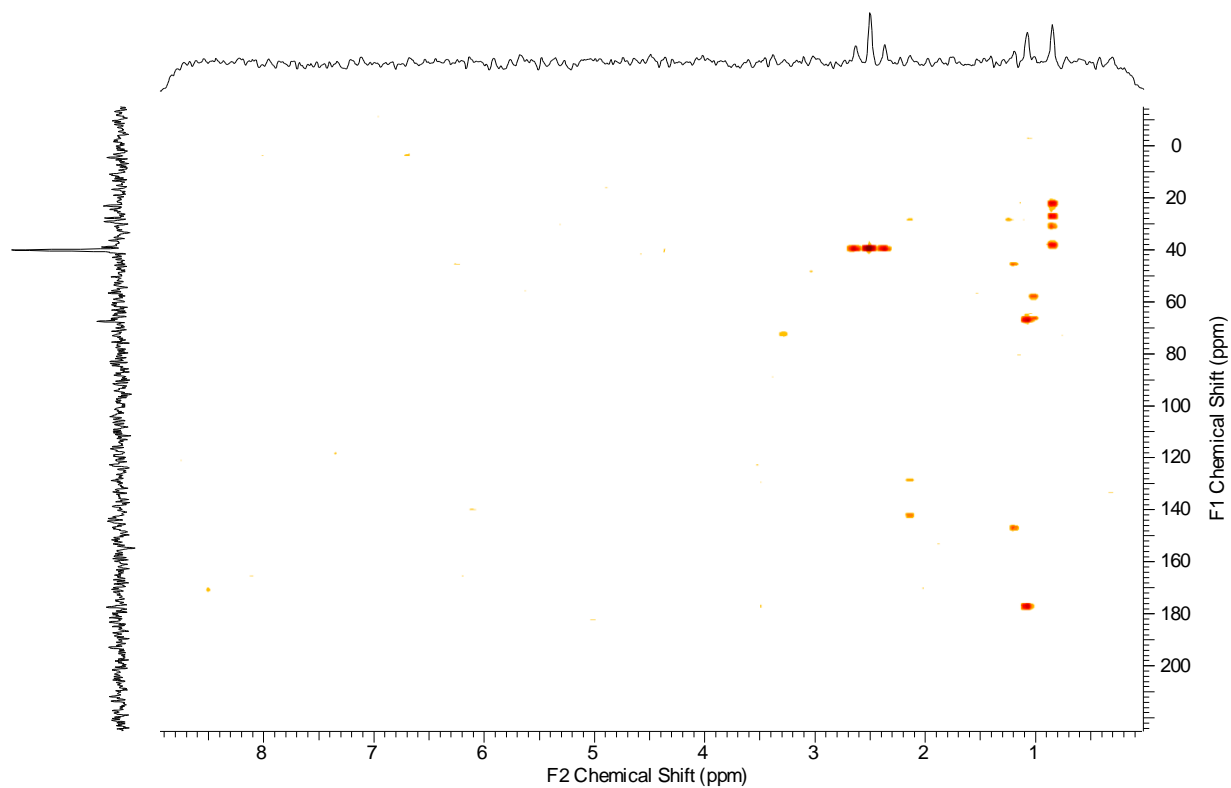

**Figure S4.**  $^1\text{H}$ - $^{13}\text{C}$  gHMBC (500 MHz,  $\text{DMSO-}d_6$ , 25  $^\circ\text{C}$ ) spectrum of compound **3**.

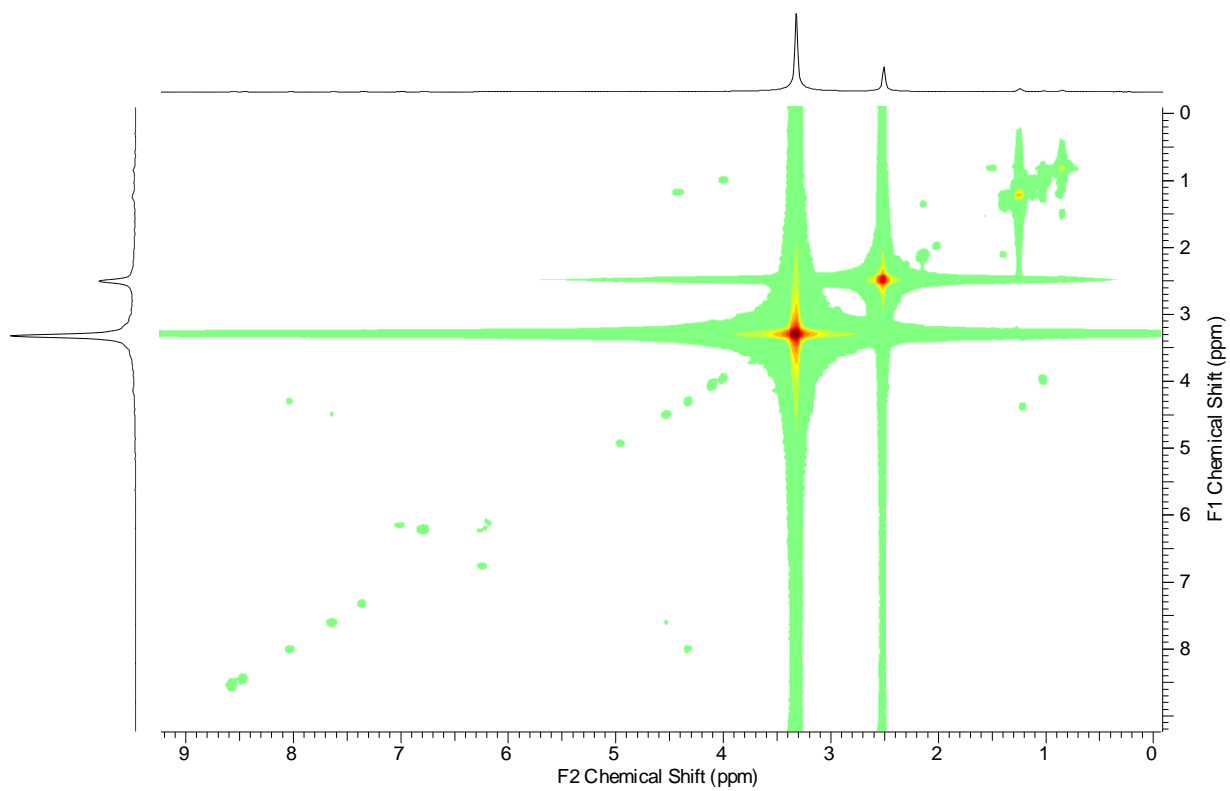

**Figure S5.**  $^1\text{H}$ - $^1\text{H}$  gCOSY (500 MHz,  $\text{DMSO-}d_6$ , 25  $^\circ\text{C}$ ) spectrum of compound **3**.

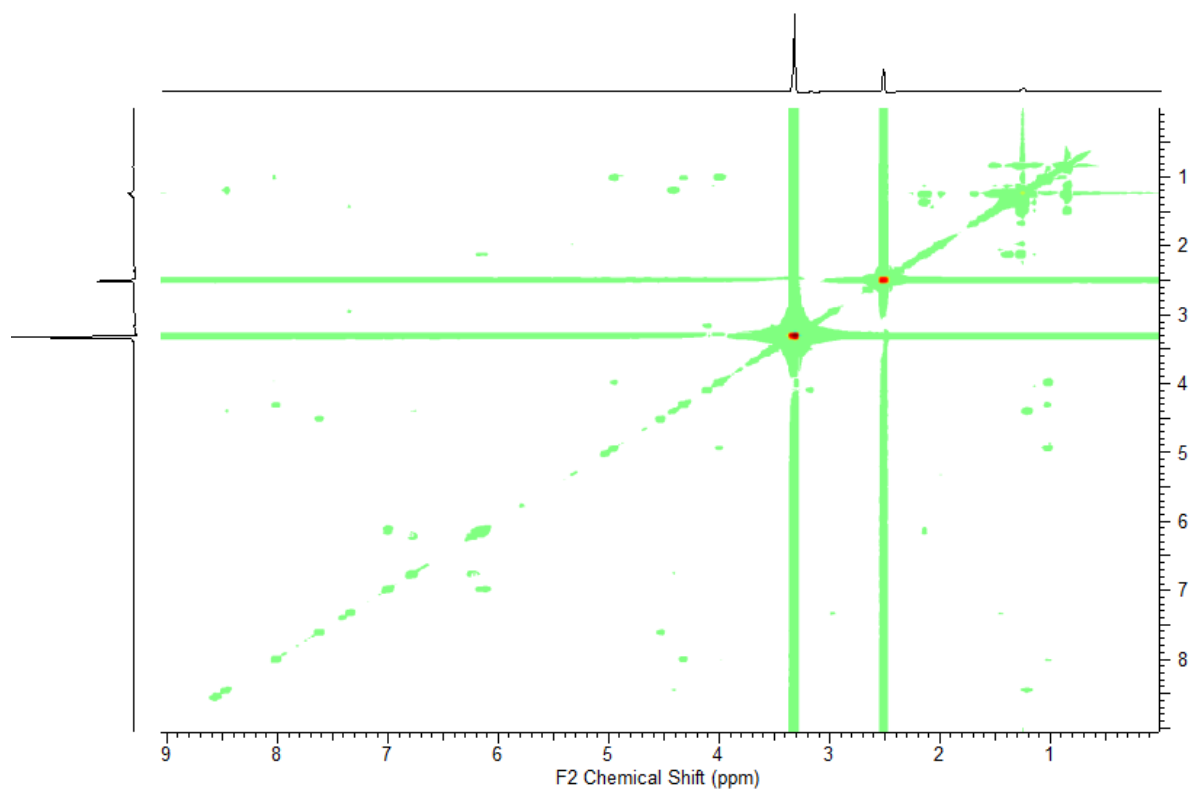

**Figure S6.** <sup>1</sup>H-<sup>1</sup>H tCOSY (500 MHz, DMSO-*d*<sub>6</sub>, 25 °C) spectrum of compound **3**.

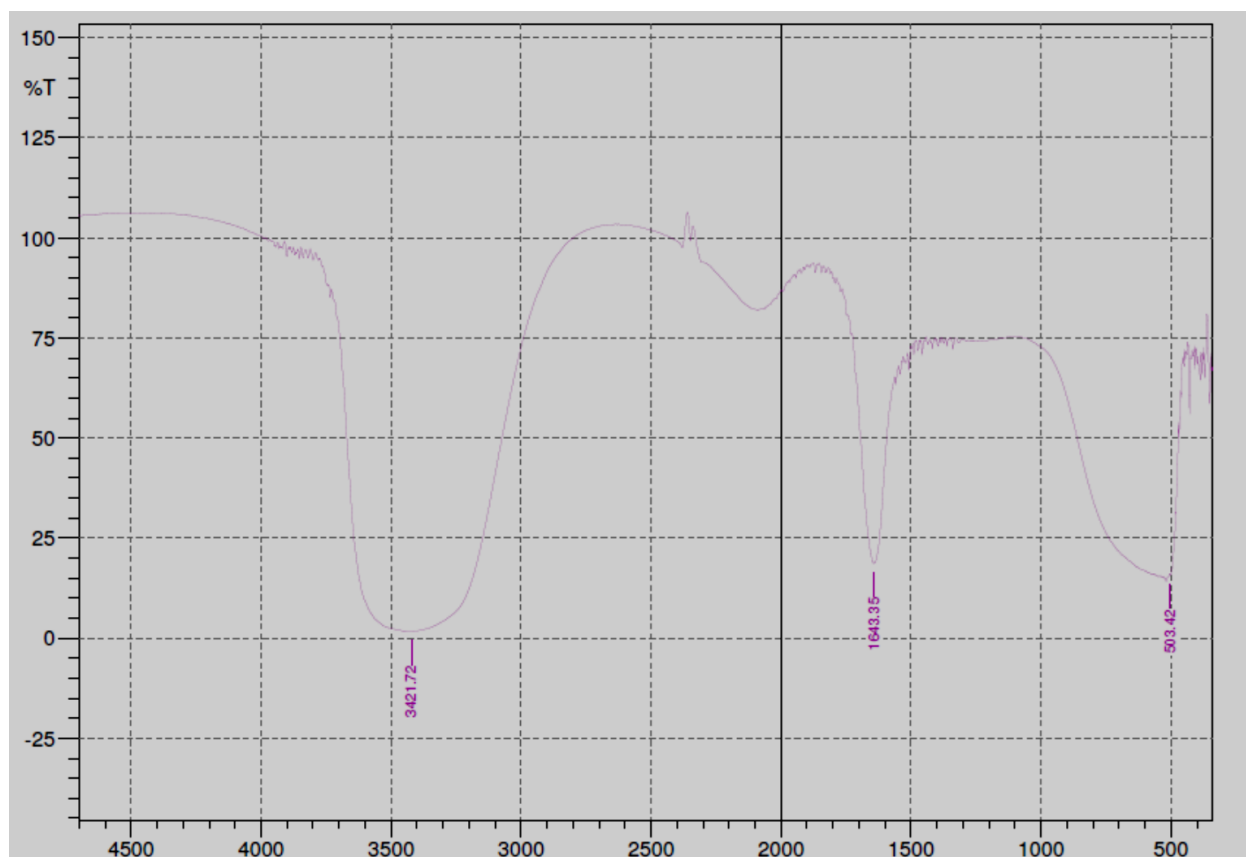

**Figure S7.** IR spectrum (thin film, room temperature) of compound **3**.

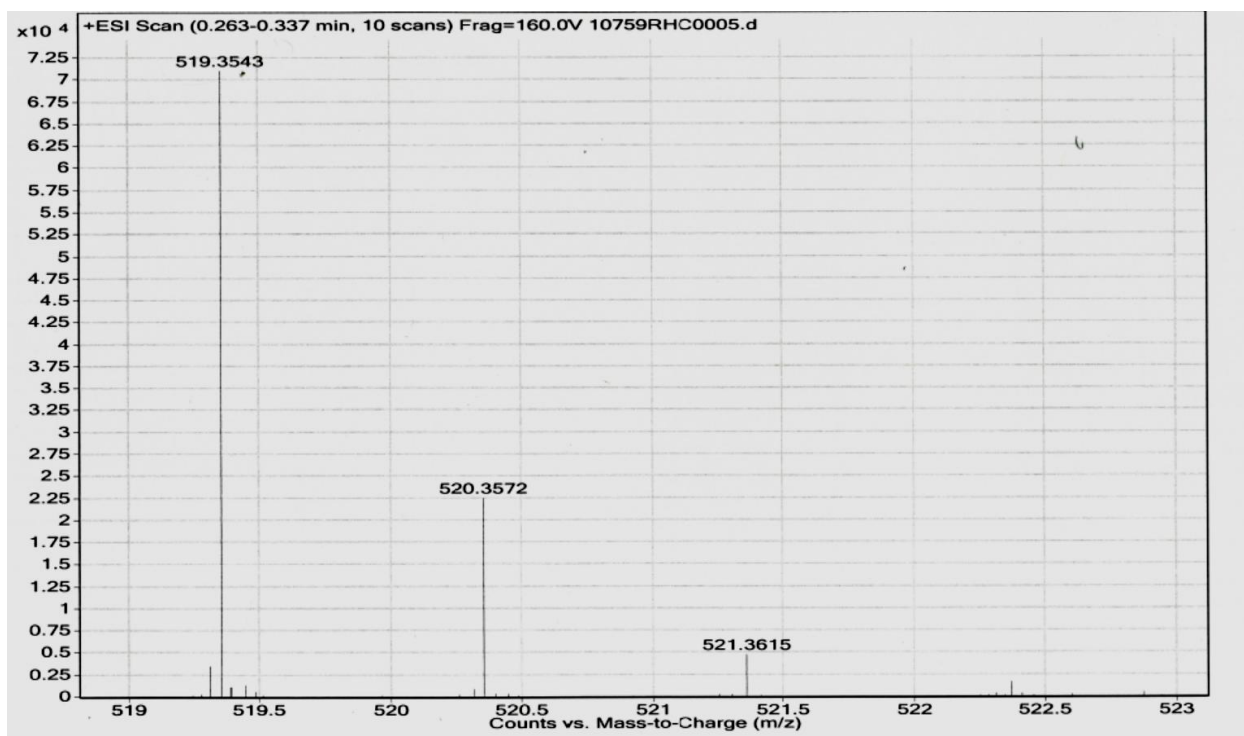

**Figure S8.** HRESIMS (positive mode) data for compound **3**.

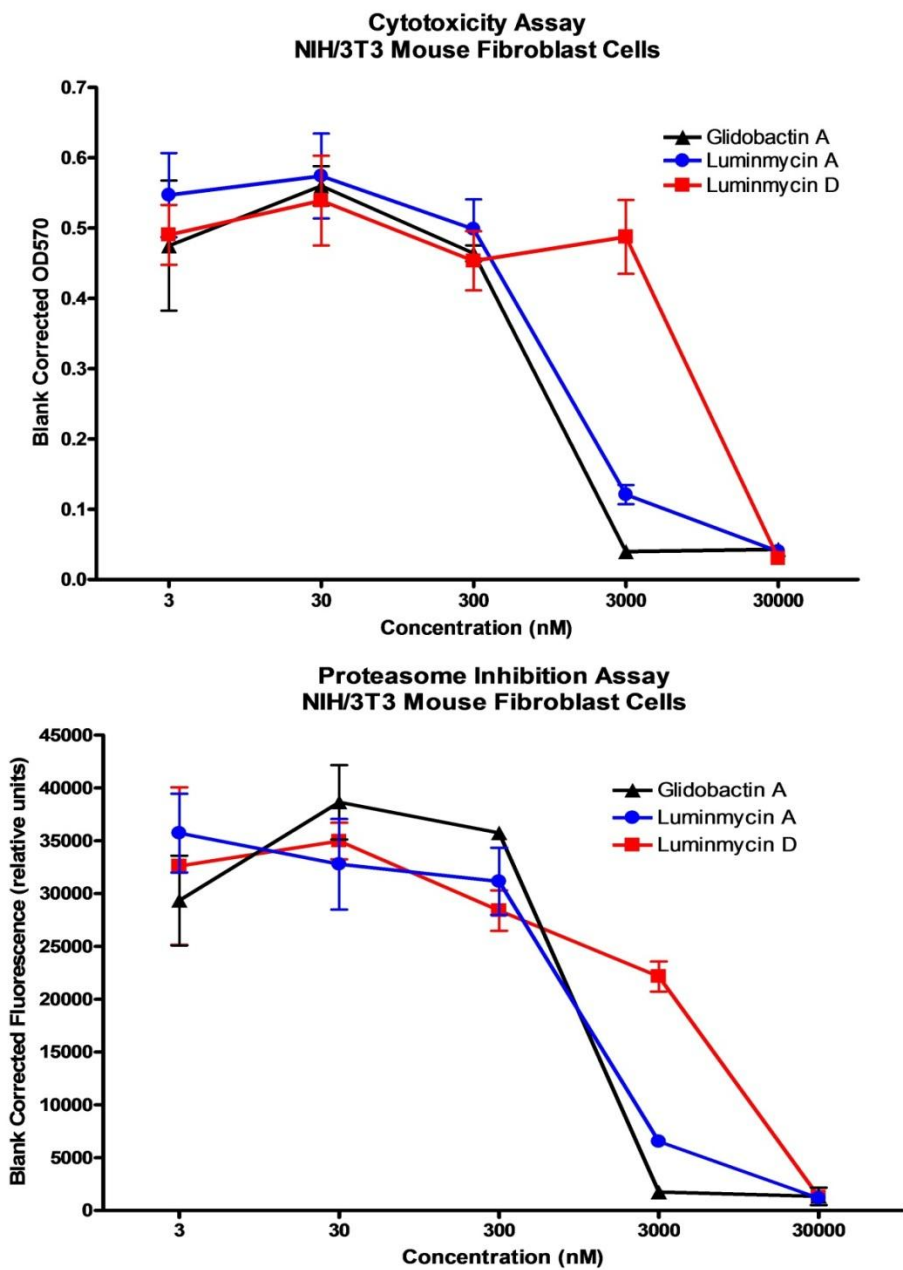

**Figure S9.** *In vitro* cytotoxicity (upper panel) and proteasome inhibition (lower panel) for **1**, **2**, and **3** in normal mouse fibroblast cells.
